# Supplementary material for: Trends in known and undiagnosed diabetes, HbA1c levels, cardiometabolic risk factors and diabetes treatment target achievement in repeated cross-sectional surveys: the population-based Tromsø Study 1994–2016
Source: HighWire-hosted journal article supplement (doi:10.1136/bmjopen-2020-041846), 2021-03-01
Supplement: bmjopen-2020-041846supp002_data_supplement.pdf [file bmjopen-2020-041846supp002_data_supplement.pdf]

**Supplementary Table 1.** Age-adjusted prevalence of total diabetes and proportion of undiagnosed diabetes among women and men aged 40-84, excluding observations following feedback\*. The Tromsø Study 1994-2016.

|                             | Tromsø 4            | Tromsø 5            | Tromsø 6            | Tromsø 7             | OR (95% CI) <sup>†</sup> | P value |
|-----------------------------|---------------------|---------------------|---------------------|----------------------|--------------------------|---------|
| Diabetes prevalence, % (n)  |                     |                     |                     |                      |                          |         |
| <b>Women</b>                |                     |                     |                     |                      |                          |         |
| Total diabetes <sup>§</sup> | N=2976<br>3.2 (120) | N=3325<br>5.1 (233) | N=6044<br>6.0 (376) | N=10290<br>5.7 (557) | 1.23 (1.14, 1.32)        | <0.001  |
| Undiagnosed <sup>§</sup>    | 33.9 (32)           | 43.8 (95)           | 32.8 (117)          | 19.0 (100)           | 0.57 (0.48, 0.68)        | <0.001  |
| <b>Men</b>                  |                     |                     |                     |                      |                          |         |
| Total diabetes <sup>§</sup> | N=2895<br>3.8 (132) | N=2433<br>6.7 (235) | N=5399<br>7.8 (428) | N=9435<br>7.7 (699)  | 1.29 (1.20, 1.38)        | <0.001  |
| Undiagnosed <sup>§</sup>    | 39.2 (38)           | 51.6 (118)          | 35.6 (140)          | 26.0 (169)           | 0.62 (0.53, 0.72)        | <0.001  |

Proportions, odds ratios (OR) with confidence intervals (CI) and p-value for trend are adjusted for age across surveys using generalized estimating equation (GEE) models. N represents crude numbers.

\*Observations of participants who had received feedback about elevated glucose or HbA1c levels in a previous Tromsø Study survey were excluded.

<sup>†</sup>Odds ratios for proportions are presented per 10 years.

<sup>§</sup>Total diabetes: self-reported diabetes or HbA1c  $\geq$  6.5%.

<sup>§</sup>Undiagnosed: proportion of those without self-reported diabetes but HbA1c  $\geq$  6.5% among those with diabetes.

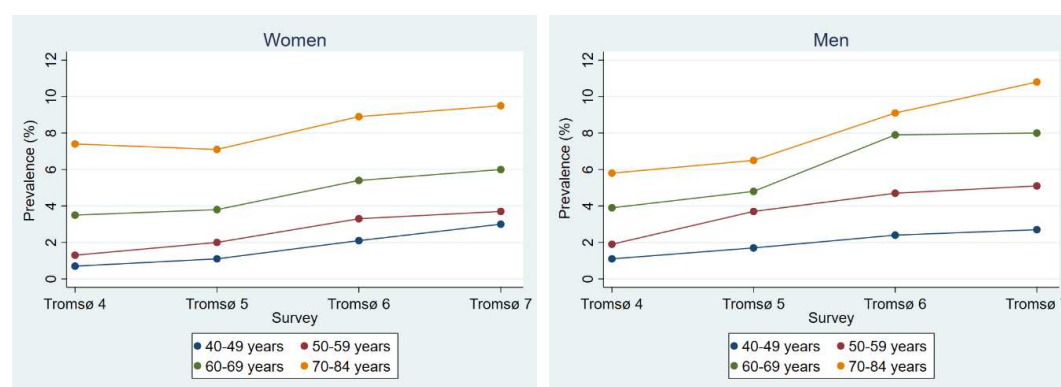**Supplementary Figure 1.** Trends in age-adjusted prevalence of self-reported diabetes among women and men. The Tromsø Study 1994-2016.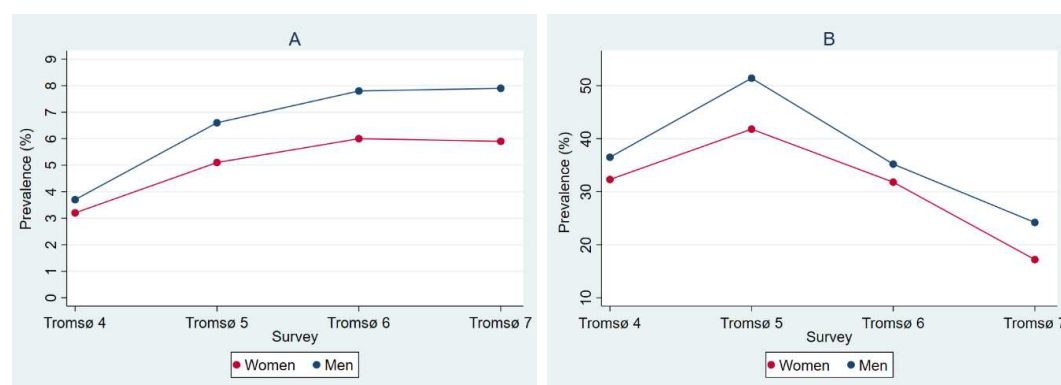**Supplementary Figure 2.** Trends in age-adjusted prevalence of diabetes (self-report or HbA1c  $\geq$  6.5%) (A) and proportion of undiagnosed diabetes (no self-reported diabetes but HbA1c  $\geq$  6.5%) among those with diabetes (B). The Tromsø Study 1994-2016.
